# Supplementary material
Source: ML conference proceedings conference paper supplement (https://openreview.net/forum?id=hw-n6BUmiyI)
Supplement: supplementary_material [file attachment]

---

# Task Discovery: Finding the Tasks that Neural Networks Generalize on

## *Supplementary Material*

---

<https://taskdiscovery.epfl.ch>

### Abstract

The supplementary material contains the following assets:

- `overview.mp4` — a short **overview video** of the work.
- `supmat_taskviz` — a directory which contains visuals of all tasks from different task networks.
- `task-discovery-viz` — a directory which contains videos visualizing the dynamic of meta-optimization for unregulated and SSL regulated discoveries.
- `code` — a directory which contains the code used to run the experiments. See `README.md` for more details.
