# Supplementary material
Source: ML conference proceedings conference paper supplement (https://openreview.net/forum?id=hw-n6BUmiyI)

$\tau_0$  (51%)  
AS:0.857

$\tau(x) = 1$

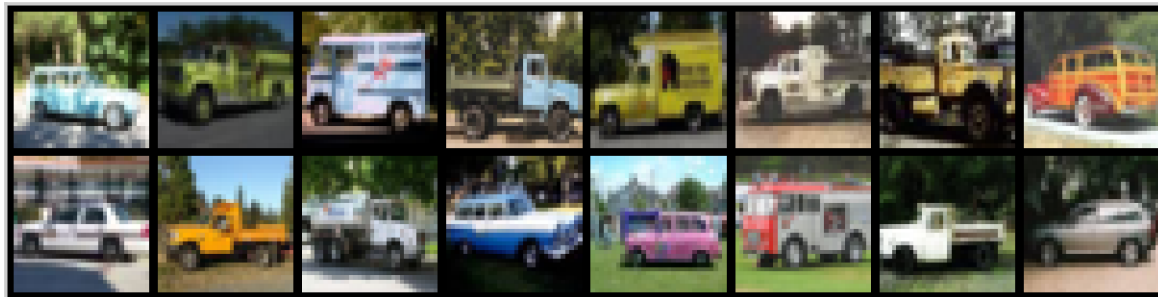

$\tau(x) = 0$

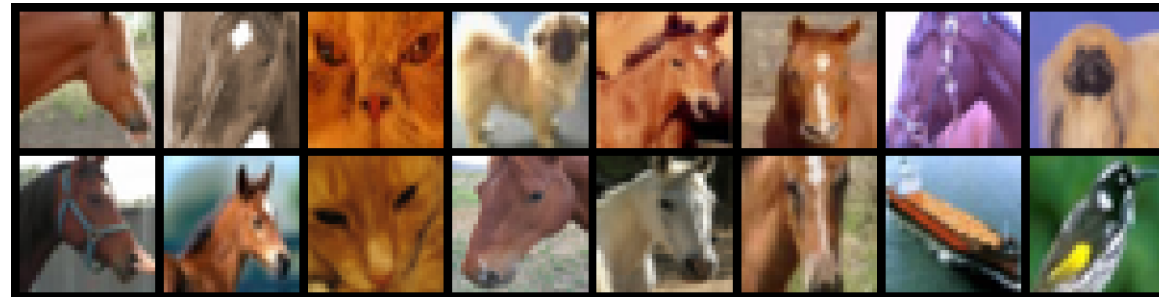

$\tau_3$  (50%)  
AS:0.842

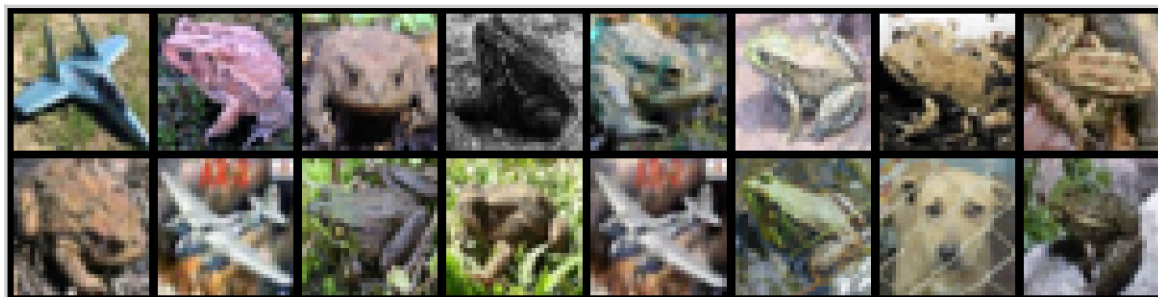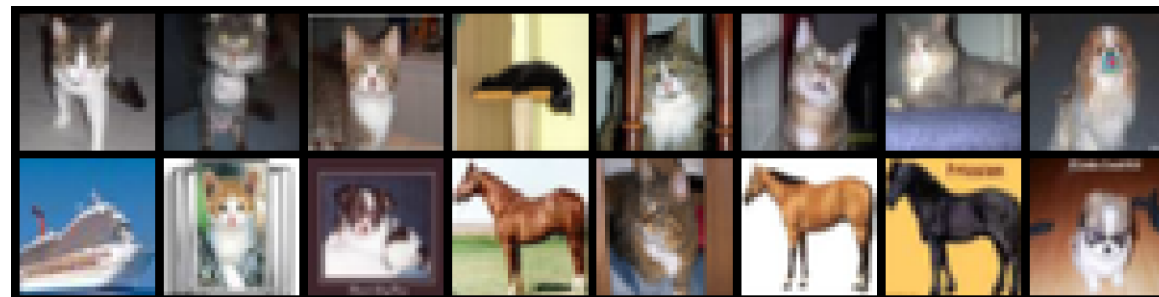

$\tau(x) = 1$

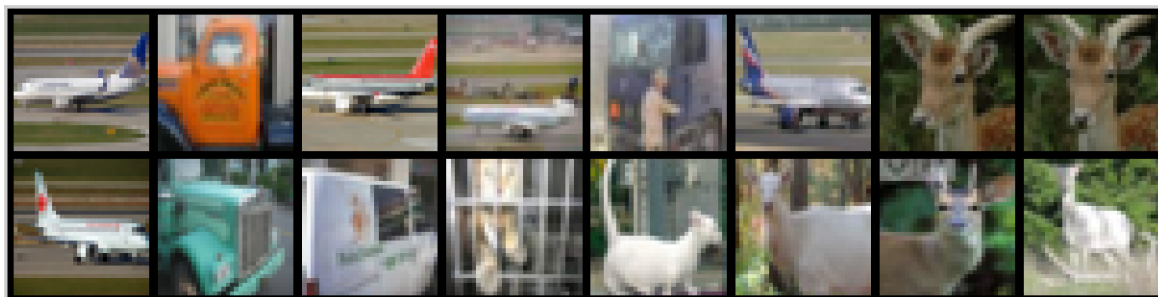

$\tau(x) = 0$

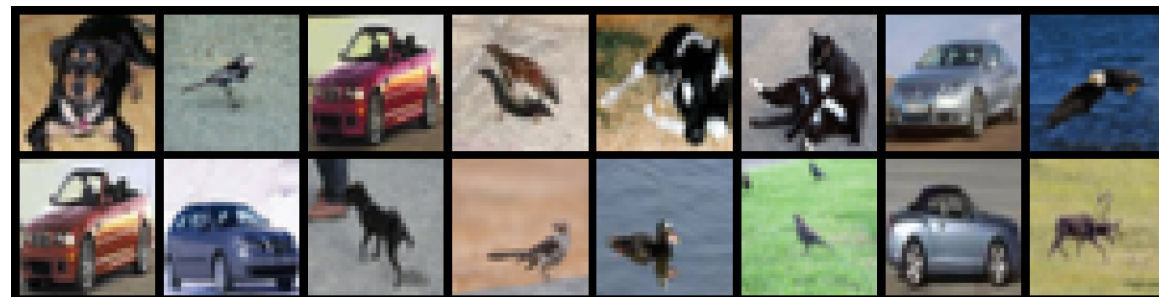

$\tau_2$  (49%)  
AS:0.838

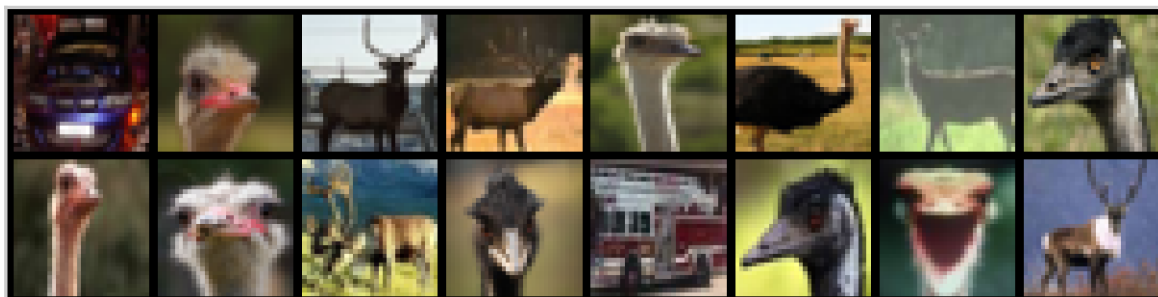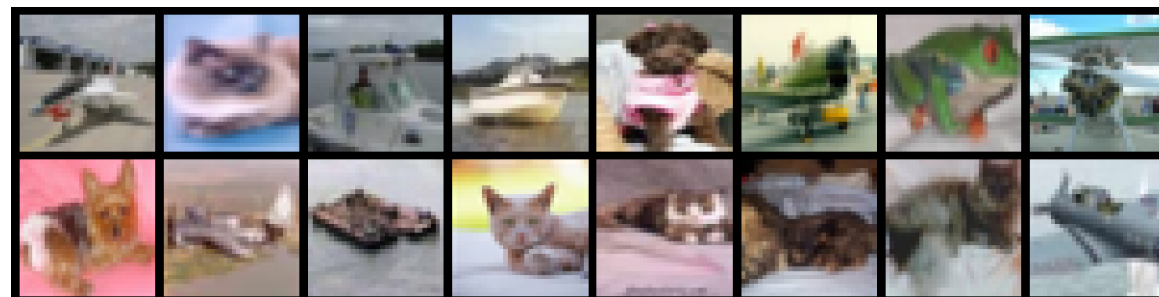

$\tau_1$  (50%)  
AS:0.803

Supplement: supplementary_material [file attachment]

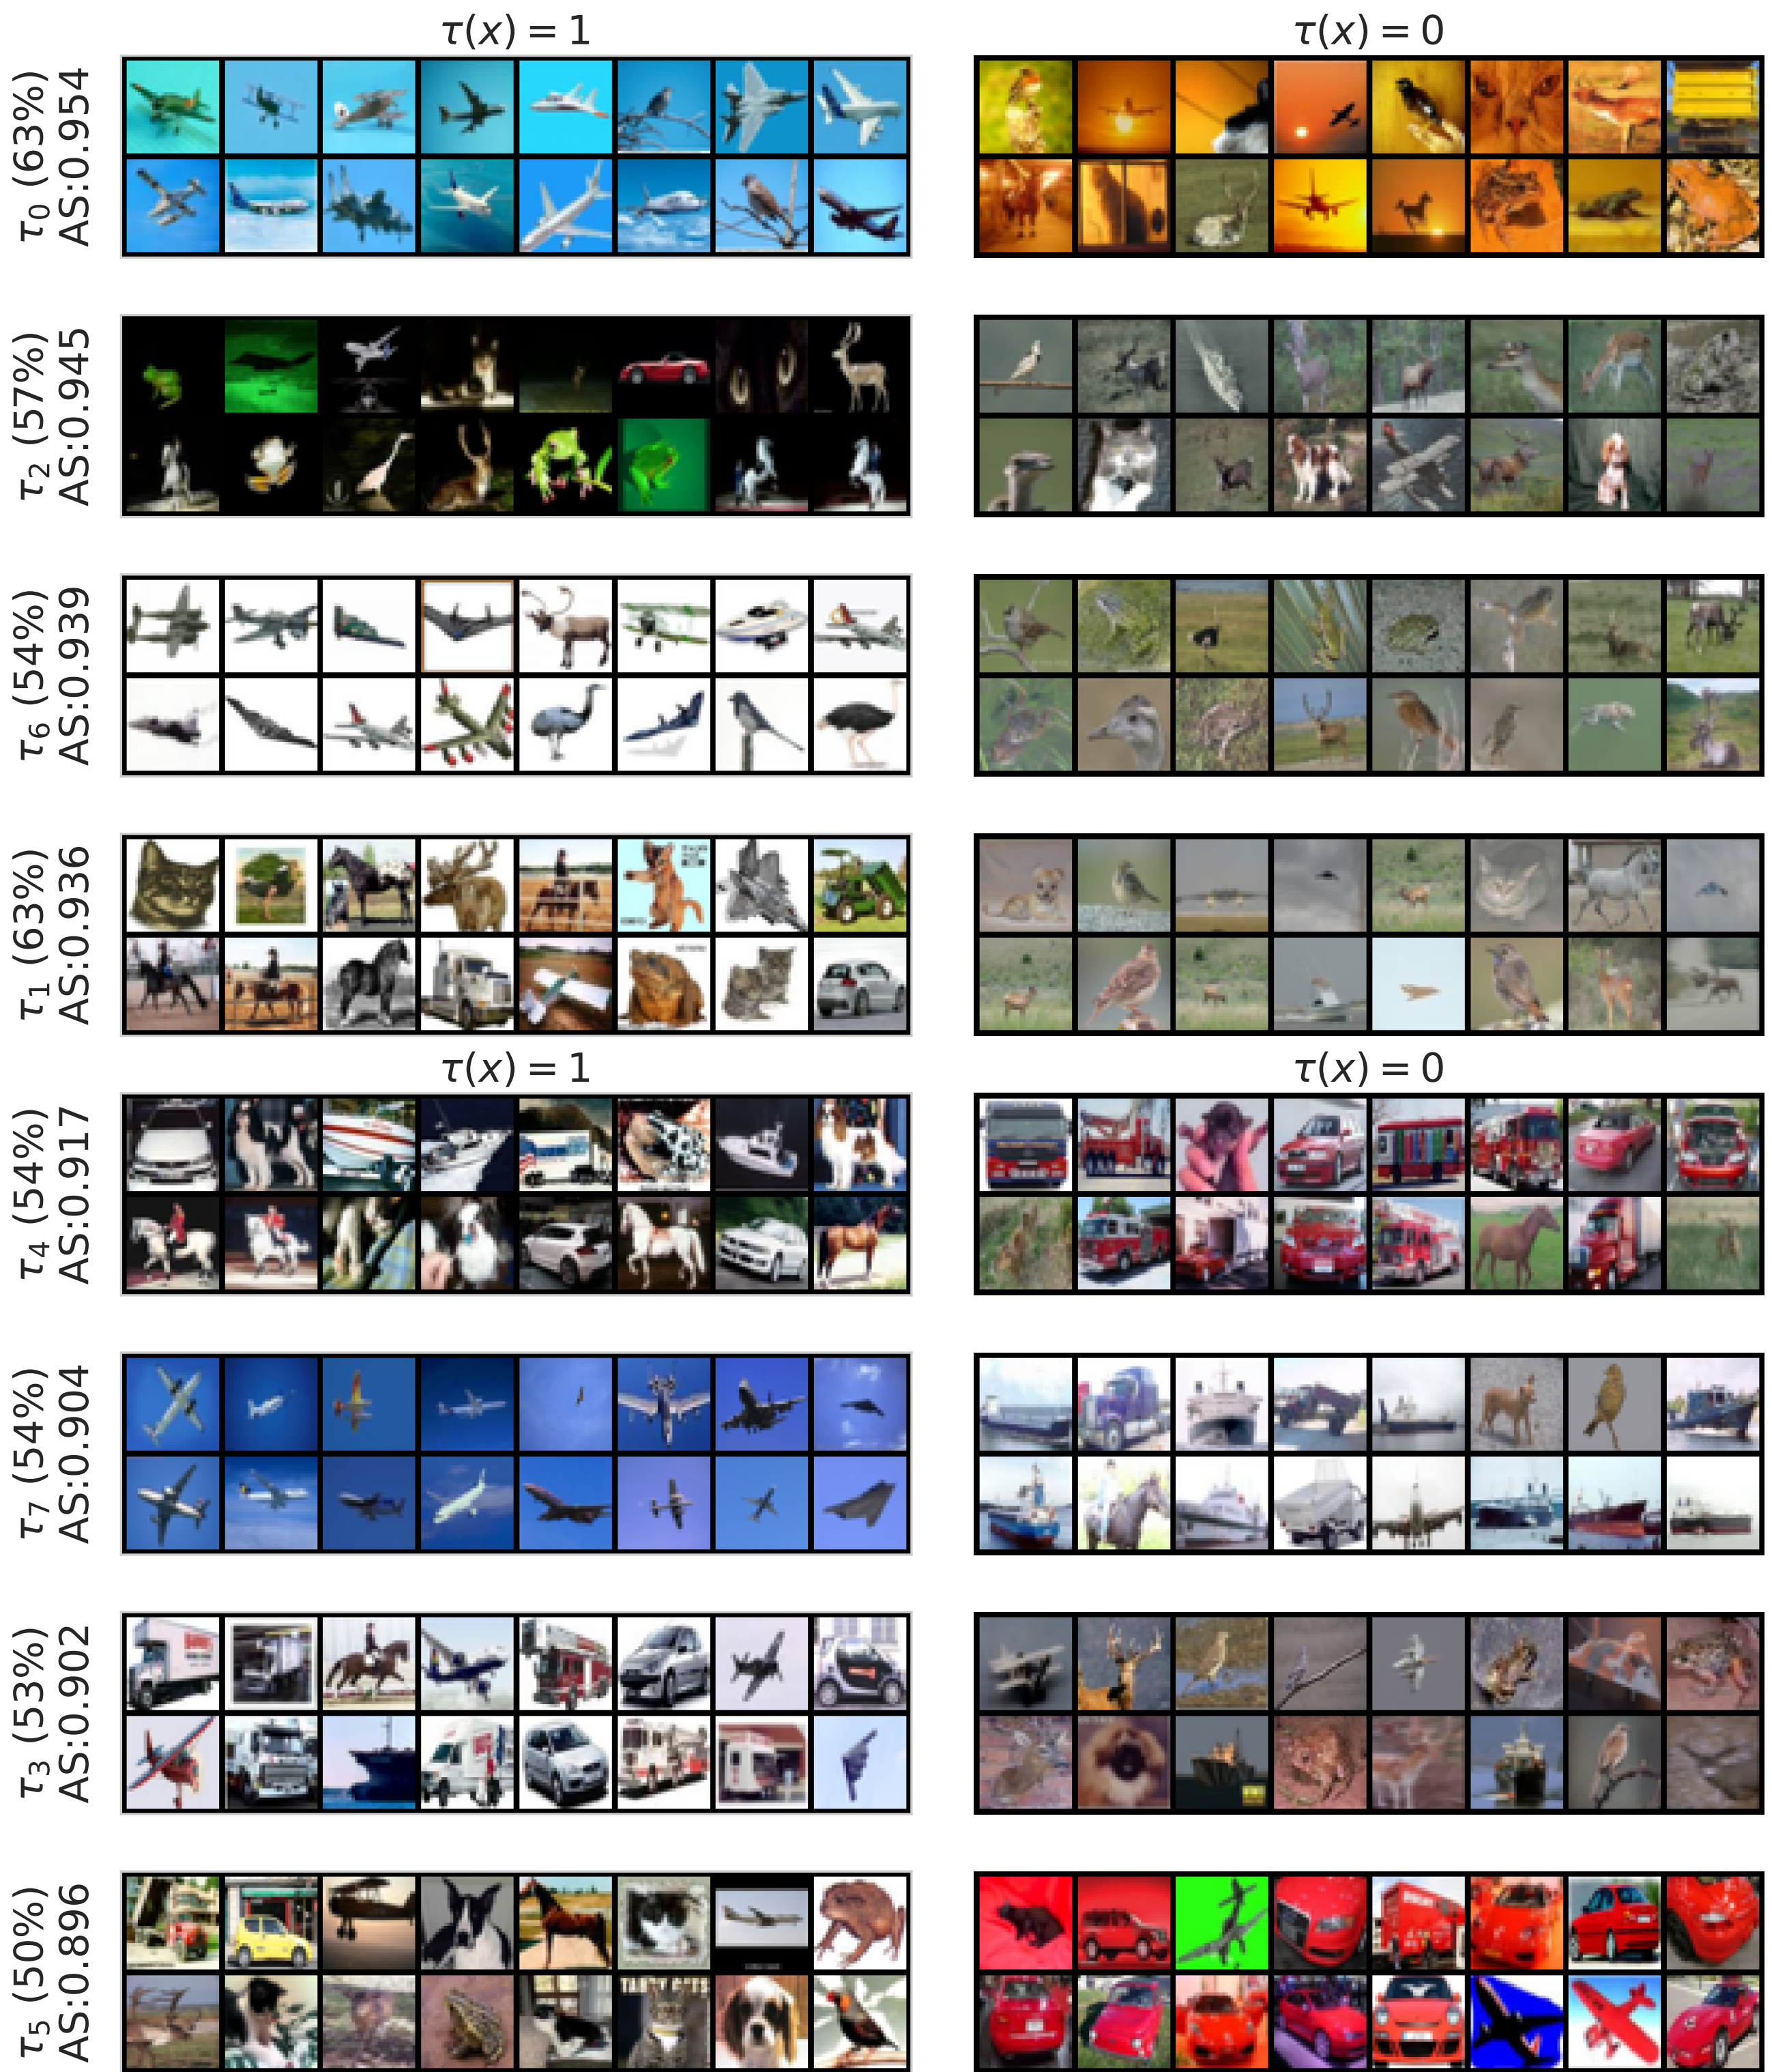

Supplement: supplementary_material [file attachment]
